# Supplementary material
Source: HighWire-hosted journal article supplement (https://thorax.bmj.com/content/thoraxjnl-2016-208649)
Supplement: inline-supplementary-material-1 [file inline-supplementary-material-1.pdf]

Supplemental table 1

## Patients with homozygous ABCA3 mutations

| Patient ID                                                | Sex | Mutation (c.DNA)      | Mutation (p.protein) | Provean           | SIFT            | Polyph en-2    | Presentation (age[y])            | Follow-up (age[y])                               | Therapy (response)                          | Mutation previously described by |
|-----------------------------------------------------------|-----|-----------------------|----------------------|-------------------|-----------------|----------------|----------------------------------|--------------------------------------------------|---------------------------------------------|----------------------------------|
| <b>other/other</b>                                        |     |                       |                      |                   |                 |                |                                  |                                                  |                                             |                                  |
| 1                                                         | m   | c.578C>G              | p.P193R              | -7.575            | 0.002           | 1.000          | RDS, PAP <sup>x</sup> (neonatal) | dead (0.15)                                      | surf (ni), ster (ni), hcl (ni)              | [1] <sup>Δ</sup>                 |
| 2                                                         | f   | c.578C>G              | p.P193R              | -7.575            | 0.002           | 1.000          | RDS, PAP <sup>x</sup> (neonatal) | dead (0.32)                                      | surf (ni), ster (ni), hcl (ni)              | [1] <sup>Δ</sup>                 |
| 3                                                         | m   | c.643C>A;<br>c.863G>A | p.Q215K;<br>p.R288K  | -3.733;<br>0.670  | 0.000;<br>1.000 | 1.000<br>0.000 | RDS (neonatal)                   | dead (0.06)                                      | ster (ni), surf (ni)                        | [2] <sup>Δ</sup>                 |
| 4                                                         | f   | c.922C>T              | p.W308R              | -8.367            | 0.000           | 1.000          | RDS (neonatal)                   | LTX (1.5), stable (3.3)                          | ster (mi), surf (mi),<br>hcl (mi)           | [3, 4]                           |
| 5                                                         | f   | c.4164G>C             | p.K1388N             | -4.810            | 0.000           | 0.999          | RDS (neonatal)                   | dead (0.20)                                      | surf (ni), ster (mi), hcl (ni)              | *                                |
| 6                                                         | m   | c.3960G>A             | p.G1314R             | -7.70             | 0.000           | 1.000          | RDS (neonatal)                   | dead (0.66)                                      | surf (mi), ster (ni), hcl (mi),<br>azt (ni) | *                                |
| 7                                                         | m   | c.4060G>A             | p.E1364K             | -3.85             | 0.000           | 1.000          | RDS, PAP <sup>x</sup> (neonatal) | dead (0.4)                                       | ster (ni)                                   | [4]                              |
| 8                                                         | m   | c.4195G>A             | p.V1399M             | -2.85             | 0.001           | 1.000          | RDS (neonatal)                   | dead (0.29)                                      | surf, ster, hcl                             | [4, 5]                           |
| 9                                                         | m   | c.3134A>G             | p.Q1045R             | -3.00             | 0.003           | 0.992          | RDS (neonatal)                   | alive with oxygen 1l/min, sick-<br>better (0.46) | ster (gi), hcl (gi)                         | [4]                              |
| 10                                                        | m   | c.1076_1078delCCT     | p.S359del            | -9.32             | na              | na             | RDS (neonatal)                   | dead (0.06)                                      | surf (mi), ster (mi)                        | *                                |
| 11                                                        | f   | c.2891G>A             | p.G964D              | -6.03             | 0.003           | 0.998          | cough, PAP <sup>x</sup> (2)      | restrictive lung disease, sick-<br>same (16)     | ster (mi)                                   | [6] <sup>Δ</sup>                 |
| 12                                                        | m   | c.2891G>A             | p.G964D              | -6.03             | 0.003           | 0.998          | cough, dyspnea (52)              | restrictive lung disease, sick-<br>same (57)     | ster (mi), azt (mi)                         | [6] <sup>Δ</sup>                 |
| 13                                                        | m   | c.2891G>A             | p.G964D              | -6.03             | 0.003           | 0.998          | none (52)                        | restrictive lung disease, sick-<br>same (57)     | none                                        | [6] <sup>Δ</sup>                 |
| <b>dead 62%<sup>+</sup> (median age 0.25<sup>+</sup>)</b> |     |                       |                      |                   |                 |                |                                  |                                                  |                                             |                                  |
| <b>null/null</b>                                          |     |                       |                      |                   |                 |                |                                  |                                                  |                                             |                                  |
| 14                                                        | m   | c.4681C>T             | p.R1561X             | truncated protein |                 |                | RDS (neonatal)                   | dead (0.13)                                      | surf (mi), ster (ni), hcl (ni)              | [2, 4, 7]                        |
| 15                                                        | f   | c.4681C>T             | p.R1561X             | truncated protein |                 |                | RDS (neonatal)                   | dead (0.39)                                      | surf (mi), ster (ni), azt (ni)              | [2, 4, 7]                        |

|    |   |                  |                   |                   |                                  |                                                                                    |                                |                  |
|----|---|------------------|-------------------|-------------------|----------------------------------|------------------------------------------------------------------------------------|--------------------------------|------------------|
| 16 | m | c.4681C>T        | p.R1561X          | truncated protein | RDS (neonatal)                   | dead (0.19)                                                                        | surf (mi), hcl (mi), ster (ni) | [2, 4, 7]        |
| 17 | m | c.4681C>T        | p.R1561X          | truncated protein | RDS (neonatal)                   | dead (0.08)                                                                        | surf (mi), ster (ni)           | [2, 4, 7]        |
| 18 | m | c.4681C>T        | p.R1561X          | truncated protein | RDS (neonatal)                   | dead (0.07)                                                                        | surf (mi), ster (ni)           | [2, 4, 7]        |
| 19 | f | c.1897-1G>C      | del Ex16          | loss of exon 16   | RDS, PAP <sup>x</sup> (neonatal) | worsening (0.3), interstitial lung disease diagnosis (0.4), LTX (1.5), dead (4.13) | ster (ni), surf (ni)           | [2] <sup>Δ</sup> |
| 20 | m | c.2429-2430delTT | p.F810Cfs*<br>2   | truncated protein | RDS (neonatal)                   | dead (0.06)                                                                        | surf (mi), hcl (ni), ster (ni) | *                |
| 21 | f | c.3005-1G>A      | del Ex22          | loss of exon 22   | RDS (neonatal)                   | dead (0.22)                                                                        | surf (ni), ster (ni)           | [2] <sup>Δ</sup> |
| 22 | m | c.4877-8delAG    | p.E1626Vfs*<br>16 | truncated protein | RDS (neonatal)                   | dead (0.04)                                                                        | surf (ni), ster (ni)           | [2] <sup>Δ</sup> |

**dead 100%<sup>+</sup> (median age 0.11<sup>+</sup>)**

Provean: < -2.5 deleterious; > 2.5 neutral; SIFT: ≤ 0.05 damaging, > 0.05 tolerated; Polyphen-2 Score: ≤ 0.1 probably damaging; 0.1 ≤ 0.2 possibly damaging; > 0.2 benign

Abbreviations: <sup>x</sup> reminiscent of PAP according to the records, \* previously undescribed mutations, <sup>+</sup> of patients without LTX, <sup>Δ</sup> patient previously published by, azt azithromycin, f female, gi good improvement, hcl hydroxychloroquine, LTX lung transplantation, m male, mi moderate improvement, na information not available, ni no improvement, PAP pulmonary alveolar proteinosis, RDS respiratory distress syndrome, surf surfactant, ster systemic steroids, y years

## Supplemental table 2

### Patients with compound heterozygous ABCA3 mutations

| Patient ID         | Sex | Mutation (c.DNA)         | Protein (p.protein) | Provean          | SIFT           | Polyphen-2     | Presentation (age[y]) | Follow-up (age[y])                                  | Therapy (response)                | Mutation previously described by |
|--------------------|-----|--------------------------|---------------------|------------------|----------------|----------------|-----------------------|-----------------------------------------------------|-----------------------------------|----------------------------------|
| <b>other/other</b> |     |                          |                     |                  |                |                |                       |                                                     |                                   |                                  |
| 23                 | f   | c.622C>T<br>c.3863-98C>T | p.R208W<br>intronic | -5.285           | 0.002          | 0.997          | RDS (neonatal)        | intermittant oxygen with infection, sick-same (2.7) | surf (mi), hcl (mi)               | [8]<br>*                         |
| 24                 | f   | c.577C>T<br>c.4261G>A    | p.P193S<br>p.G1421R | -6.721<br>-7.696 | 0.014<br>0.000 | 1.000<br>1.000 | RDS (neonatal)        | LTX (0.6), dead (0.7)                               | surf (mi), hcl (ni),<br>ster (ni) | *<br>*                           |

|    |   |                                  |                             |                  |                  |                |                                                                                                                 |                                          |                                       |                  |
|----|---|----------------------------------|-----------------------------|------------------|------------------|----------------|-----------------------------------------------------------------------------------------------------------------|------------------------------------------|---------------------------------------|------------------|
| 25 | m | c.577C>T<br>c.4261G>A            | p.P193S<br>p.G1421R         | -6.721<br>-7.696 | 0.014<br>0.000   | 1.000<br>1.000 | RDS (neonatal)                                                                                                  | dead (0.5)                               | surf (mi), ster (ni)                  | *<br>*           |
| 26 | m | c.806_807ins<br>GCT<br>c.4157T>C | p.L268_L269insL<br>p.L1386P | -7.743<br>-6.168 | Na<br>0.001      | Na<br>1.000    | RDS, PAP <sup>x</sup><br>(neonatal)                                                                             | dead (0.4)                               | surf (ni), whole lung<br>lavages (ni) | [4]<br>[4]       |
| 27 | m | c.127C>T<br>c.622C>T             | p.R43C<br>p.R208W           | -6.043<br>-5.285 | 0.000<br>0.002   | 1.000<br>0.997 | cough,<br>tachydyspnea,<br>failure to thrive<br>(0.9), PAP <sup>x</sup> ,<br>clubbing,<br>repeated<br>pneumonia | dead (4.5)                               | surf (ni), ster (mi)                  | [4]<br>[9, 10]   |
| 28 | f | c.94C>T<br>c.3941G>A             | p.P32S<br>p.G1314E          | -2.963<br>-7.696 | 0.029<br>0.000   | 0.902<br>1.000 | cough,<br>cyanosis,<br>retractions,<br>wheezing,<br>failure to thrive<br>(0.5), clubbing                        | dead (3.6)                               | ster (gi), hcl (mi)                   | *<br>*           |
| 29 | f | c.742C>T<br>c.3358G>T            | p.P248S<br>p.V1120F         | -5.80<br>-4.55   | 0.018<br>0.010   | 1.000<br>1.000 | RDS, PAP <sup>x</sup><br>(neonatal)                                                                             | dead (0.25)                              | surf (ni), ster (ni)                  | *<br>*           |
| 30 | f | c.839G>A<br>c.3914G>T            | p.R280H<br>p.R1305L         | -2.70<br>-4.89   | 0.016<br>0.004   | 1.000<br>0.260 | RDS (neonatal)                                                                                                  | dead (day 0)                             | ster (ni), surf (ni)                  | [4]<br>*         |
| 31 | f | c.2125C>T<br>c.3579C>G           | p.R709W<br>p.I1193M         | -3.055<br>-2.642 | 0.003<br>0.001   | 0.716<br>0.934 | dyspnea at<br>exercise, PAP <sup>x</sup><br>(33)                                                                | dyspnea at exercise,<br>sick-same (36)   | repeated whole<br>lung lavages (mi)   | [8]<br>*         |
| 32 | f | c.2857G>C<br>c.3229T>A           | p.D953H<br>p.F1077I         | -1.23<br>-1.41   | 0.109<br>0.369   | 0.968<br>0.002 | mycoplasm<br>pneumonia,<br>clubbing,<br>hypoxemia<br>(2.2)                                                      | SaO2 88-90%, sick-<br>same (7.4)         | ster (mi)                             | *<br>[4]         |
| 33 | f | c.2888A>G<br>c. 875A>T           | p.Y963C<br>p.E292V          | -8.27<br>-6.53   | 0.0002<br>0.0000 | 1.000<br>0.989 | na                                                                                                              | repeated<br>pneumonia, sick-<br>same (3) | na                                    | [8]<br>[4, 9-13] |

|                                    |   |                                                  |                                                     |                                          |                      |                           |                                                          |                                                                                          |                                                     |                                        |
|------------------------------------|---|--------------------------------------------------|-----------------------------------------------------|------------------------------------------|----------------------|---------------------------|----------------------------------------------------------|------------------------------------------------------------------------------------------|-----------------------------------------------------|----------------------------------------|
| 34                                 | f | c.2393T>C<br>c.4853G>C                           | p.L798P<br>p. R1612P                                | -6.60<br>-2.41                           | 0.000<br>0.091       | 1.000<br>0.322            | RDS, PAP <sup>x</sup><br>(neonatal)                      | dead (0.28)                                                                              | surf (mi), ster (ni),<br>hcl (ni)                   | [14] <sup>Δ</sup><br>[14] <sup>Δ</sup> |
| <b>dead 64%+ (median age 0.4+)</b> |   |                                                  |                                                     |                                          |                      |                           |                                                          |                                                                                          |                                                     |                                        |
| <b>null/other</b>                  |   |                                                  |                                                     |                                          |                      |                           |                                                          |                                                                                          |                                                     |                                        |
| 35                                 | f | c.2905C>T<br>c.4311_12ins<br>G                   | p.P969S<br>p.D1439Gfs*11                            | -7.033                                   | 0.036                | 0.999                     | RDS (neonatal),<br>then better,<br>cough from 6<br>weeks | ventilated with<br>tracheostomy, short<br>time intervals<br>without ventilation<br>(8.8) | surf, ster, hcl (gi),<br>azt, whole lung<br>lavages | *<br>*                                 |
| 36                                 | f | c.4360-1G>C<br>c.3137C>A<br>c.4012G>A            | Del Ex29<br>p.A1046E<br>p.A1338T                    | loss<br>-4.200<br>-0.554                 | of<br>0.000<br>0.554 | exon 29<br>1.000<br>0.146 | RDS (neonatal),<br>tracheotomia<br>(0.1)                 | respiratory<br>insufficiency, dead<br>(0.2)                                              | surf (ni), ster (mi),<br>hcl (mi)                   | *<br>*<br>COSM4059368                  |
| 37                                 | f | c.875A>T<br>c.2293G>T                            | p.E292V<br>p.E765X                                  | -6.533<br>Truncated protein              | 0.000                | 0.999                     | RDS (neonatal)                                           | intermittant<br>oxygen and<br>infections, sick<br>better (7)                             | surf, ster, hcl (gi)                                | cf pt 33<br>*                          |
| 38                                 | f | c.1736T>C                                        | p.L579P                                             | -6.650                                   | 0.000                | 1.000                     | RDS, PAP <sup>x</sup><br>(neonatal)                      | respiratory<br>insufficiency, dead<br>(0.1)                                              | ster (ni), surf (ni)                                | [2] <sup>Δ</sup>                       |
| 39                                 | f | c.3812delG<br>c.4751delT<br>c.128G>T<br>c.863G>A | p.R1272Gfs*73<br>p.L1584Rfs*49<br>p.R43L<br>p.R288K | Truncated protein<br>na<br>-4.51<br>0.67 | na<br>0.002<br>1.000 | na<br>1.000<br>0.000      | RDS (neonatal)                                           | respiratory<br>insufficiency, dead<br>(0.13)                                             | surf (ni), ster (ni)                                | [2] <sup>Δ</sup>                       |
| <b>dead 60% (median age 0.13)</b>  |   |                                                  |                                                     |                                          |                      |                           |                                                          |                                                                                          |                                                     |                                        |
| <b>null/null</b>                   |   |                                                  |                                                     |                                          |                      |                           |                                                          |                                                                                          |                                                     |                                        |
| 40                                 | f | c.1601_1604d<br>up ACCT<br>c. 3907delG           | p.S536Pfs*10<br>p.V1303Sfs*43                       | Truncated protein<br>Truncated protein   |                      |                           | RDS (neonatal)                                           | respiratory<br>insufficiency, dead<br>(0.19)                                             | surf (ni), ster (ni),<br>hcl (ni)                   | *<br>*                                 |
| <b>dead 100%</b>                   |   |                                                  |                                                     |                                          |                      |                           |                                                          |                                                                                          |                                                     |                                        |

Provean: < -2.5 deleterious; > 2.5 neutral; SIFT: ≤ 0.05 damaging, > 0.05 tolerated; Polyphen-2 Score: ≤ 0.1 probably damaging; 0.1 ≤ 0.2 possibly damaging; > 0.2 benign

Abbreviations: <sup>x</sup> reminiscent of PAP according to the records, \* previously undescribed mutations, <sup>+</sup> median death age of patients without LTX, <sup>Δ</sup> patient previously published by, azt azithromycin, BAL bronchoalveolar lavage, f female, gi good improvement, hcl hydroxychloroquine, LTX lung transplantation, m male, mi moderate improvement, na information not available, ni no improvement, RDS respiratory distress syndrome, surf surfactant, ster systemic steroids, y years

### Supplemental table 3

**Primers used for analysis of ABCA3. The sequence of all PCR primers is given in the 5' to 3' direction.**

#### **ABCA3 gene**

A3-4-1 CCAAATCCCCACTCTGCGTG  
A3-5-2 CAGCTGCTTCGCACATCCTG  
A3-6-1 CAAAGCCCTAGAGGATTTGCC  
A3-6-2 CAGACCCAAAGGAGTGACTGC  
A3-7-1 CTCTCCCACTCCACCCTGTTG  
A3-7-2 CTGCTATAAGGACACATGCACACG  
A3-8-1 TCTCATTTGCTGTCAGTGTGTGG  
A3-8-2 CTAAAACACCAAGCCTTTGGACATG  
A3-9-1 CTGCTGGGACAGTCGGACTC  
A3-9-2 CTGACCATCCCTGGTCACAGG  
A3-10-1 CTCTTGGGAAGAAGTTTGTGGTCAG  
A3-10-2 GCTGACTTTCCTCCTTCCAGTCC  
A3-11-1 GTGTAGATGGCAAGTGCCAGGAG  
A3-11-2 CAGCTATCCAGCCCACACTCAG  
A3-12-1 CATGCCAACCAAGCAGTGG  
A3-12-2 CTCTCTCTGAACCAGTCCCAAGG  
A3-13-1 CTGCATGGCTGTGTGCATCTAG  
A3-13-2 CTATGAGGTCTCACTGCCGTGC  
A3-14-1 CTAGGCTTGGTTCCTTCTGAGACG  
A3-14-2 GTGCATCTCCTGCCGCTGTG

A3-15-1 CAGGGTCCTCAGAGGAAATTAGG  
A3-15-2 CTCAGAACCCTGGCTCCTGC  
A3-16-1 CAGCTACGTCAAGGAGAGGTTCC  
A3-16-2 GCTCGTCCAGTATCAGCACCTG  
A3-17-1 CCATCCTTGGAGGACTCAAGC  
A3-17-2 CAGAGGCAACAGACAGGAAGTCTAG  
A3-18-1 CAAGACACATTCATTCTGCTTCAGC  
A3-18-2 GCAGATTCATCTGGGCTGATG  
A3-19-1 GTTCAAGTGTTCTCCTGCCTCTG  
A3-19-2 CTGGGCAACTAGAGTGAAACTCC  
A3-20-1 CATAAGCAGATGCATGAGCAAGC  
A3-20-2 CTCGCAGACTCTCCTCTGCATG  
A3-21-1 GCTGGCGTCACACAGAACAG  
A3-21-2 CATTGGAACAGCCAAGAACC  
A3-22-1 GTCCCTGATTAGCCATGCTCAG  
A3-22-2 GCAGACACAATGCTCTATCTATGGG  
A3-23-1 GTGCTTGTGCTCTCCATAAGC  
A3-23-2 CAGCTGGTTCCGTTCTGC  
A3-24-1 GTCTGAGGACCTCAAATGCTC  
A3-24-2 CATGAACTGGGCCATTGC  
A3-25-1 CTCCACACAGCACGGATAAGG  
A3-25-2 CCACTCAGACGCAGAGGAGC  
A3-26-1 GTCTGCCATGTCGCTCATGG  
A3-26-2 GAGACCATCTGGTGCAGGAGC  
A3-27-1 GATTGGGACGAGAAGCCTTG  
A3-27-2 GCAAAGCAGAGCAGTCTGAGC  
A3-28-1 CTGATTATCAAGGAGCTCTCCAAGG  
A3-28-2 CAAGCCACAGATGCAGCAGC  
A3-29-1 CACTGGCAGGAACACAG  
A3-29-2 CTCCATCCTGGAGCCACAAG  
A3-30-1 CTGTTCTGCAATTGCTGGGTG  
A3-30-2 GACTCTGCACCAGATGCTGATG  
A3-31-1 GAGAGCCAATGCCTTCCTGTC

A3-31-2 GTGCTCAGCACTGGAGTCCTC  
A3-32-1 GAGGACTCCAGTGCTGAGCAC  
A3-32-2 GTGACTCCTCTGTGGAAAGAGCC  
A3-33-1 CTATTGCCAGAGGACTCCCAGG  
A3-33-2 GAGTGCCTGGAGAAATCAACC

**Supplemental table 4 - Clinical characteristics of 22 patients with homozygous ABCA3 mutations**

| <b>Characteristic</b>           | <b>Number of patients</b>                                                                                                                                                                                  |
|---------------------------------|------------------------------------------------------------------------------------------------------------------------------------------------------------------------------------------------------------|
| n                               | 22                                                                                                                                                                                                         |
| Sex                             | 15m, 7f                                                                                                                                                                                                    |
| Family history                  | 8 families 1-2 abortions and/or 1-2 siblings or cousins or other family members died due to lung disease age 0-11 months, 1 healthy family, 8 na                                                           |
| Mother mutation                 | 12 heterozygous, 10 na                                                                                                                                                                                     |
| Father mutation                 | 13 heterozygous, 9 na                                                                                                                                                                                      |
| Consanguinity                   | 17 yes, 1 no, 4 na                                                                                                                                                                                         |
| Ethnic group                    | 14 Caucasian, 2 African, 1 Indian, 5 na                                                                                                                                                                    |
| Gestational age                 | 13 mean 40 weeks (36-42), 9 na                                                                                                                                                                             |
| Neonatal mechanical ventilation | 17 yes, 4 no, 1 na                                                                                                                                                                                         |
| Other organs problems           | 1 hyperbilirubinemia, 1 arteria cerebri media infarction/hepatomegaly, 1 nephromegaly/seizures, 1 PFO, 1 pyelonephritis/VSD/cholecystitis, 1 ASD/VSD, 1 chronic ischemic heart disease (57y), 9 none, 6 na |

Abbreviations: f female, m male, na no information available, PFO persistent foramen ovale, VSD ventricular septal defect, y years





## Supplemental table 5

### Clinical characteristics of 18 patients with compound heterozygous ABCA3 mutations

| Characteristics                 | Number of patients                                                                                                                                                                                                                     |
|---------------------------------|----------------------------------------------------------------------------------------------------------------------------------------------------------------------------------------------------------------------------------------|
| N                               | 18                                                                                                                                                                                                                                     |
| Sex                             | 15f; 3m                                                                                                                                                                                                                                |
| family history                  | 2 siblings in one family death age 0.5 and 0.7; 2 siblings in 1 family postpartal RDS then healthy, 1 sibling in one family death due to neonatal RDS, 2 siblings in same family healthy, 1 atopic dermatitis, 5 families healthy, 7na |
| mother mutation                 | 12 het, but healthy, 6 na                                                                                                                                                                                                              |
| father mutation                 | 11 het, but healthy, 1 no, 6 na                                                                                                                                                                                                        |
| Pregnancy                       | 1 IVF, 1 PROM, 1 gestosis, 1 placental insufficiency, 1 oligohydramnion and SGA, 12 na, 1 none                                                                                                                                         |
| consanguinity                   | 10 no, 8 na                                                                                                                                                                                                                            |
| ethnic group                    | 16 Caucasian, 1 na, 1 family African/Asian                                                                                                                                                                                             |
| gestational age                 | mean 37.3 (33-42); 6 na                                                                                                                                                                                                                |
| neonatal oxygen                 | 14 yes, 2 no, 2 na                                                                                                                                                                                                                     |
| neonatal mechanical ventilation | 12 yes, 4 no, 2 na                                                                                                                                                                                                                     |
| failure to thrive               | 8 yes of whom 1 PEG, 10 na                                                                                                                                                                                                             |
| other organ problems            | 1 cor triatriale sinistrum/atrium septal defect II, 1 PFO/PDA one cleft palate, 1 systemic inflammatory response syndrome (age 3.5y), 1 gastroesophageal reflux, 1 benign occipital epilepsy/microcephaly, 13 na                       |

Abbreviations: f female, LTX lung transplantation, m male, na no information available, PFO persistent foramen ovale, PDA persistent ductus arteriosus, RDS respiratory distress syndrome, y years

**Supplemental table 6**

**Hydrophobic surfactant proteins (SP) C and B. Semiquantitative levels assessed by Western blotting in bronchoalveolar lavage fluid of patients with homozygous ABCA3 mutations**

| Pt ID | Age at BAL<br>(years) | SP-C<br>mol wt. (kDa) |       | SP-B<br>mol. wt. (kDa) |     |       |
|-------|-----------------------|-----------------------|-------|------------------------|-----|-------|
|       |                       | 4                     | 8     | 8                      | 16  | 24    |
| 1     | 0.1                   | 0                     | 0     | +                      | ++  | 0     |
| 4     | 0.1                   | +++*                  | 0     | ++                     | +++ | +++   |
| 6     | 0.1                   | 0                     | 0     | 0                      | +++ | 0     |
| 5     | 0.1                   | 0                     | +++** | +++                    | +++ | +++** |
| 10    | 0.04                  | 0                     | 0     | 0                      | +++ | +++   |
| 11    | 13.1                  | 0                     | 0     | 0                      | ++  | 0     |
| 12    | 52                    | 0                     | 0     | 0                      | ++  | 0     |
| 15    | 0.11                  | 0                     | 0     | 0                      | +++ | +++   |
| 16    | 0.01                  | 0                     | 0     | 0                      | +   | 0     |
| 17    | 0.01                  | 0                     | 0     | 0                      | +   | 0     |
| 18    | 0.07                  | 0                     | 0     | 0                      | ++  | +     |
| 19    | 0.21                  | 0                     | 0     | ++                     | 0   | 0     |
| 22    | 0.01                  | 0                     | 0     | +                      | 0   | 0     |

Immune reactive bands were semiquantitatively expressed in relation to standard run concurrently (Griese et al 2015). 0 no band, + > 0 but below reference range, ++ within reference range, +++ above reference range  
Reference values SP-C (4-5 kDa 116 ± 14 ng/ml; 8 kDa 140 ± 81 ng/ml), SP-B (8kDa 68 ± 22 ng/ml; 16-18kDa 580 ± 53 ng/ml; 24-38 kDa 288 ± 89 ng/ml)

underscored = patients with p.R1561X

\* likely that sample was taken after exogenous surfactant application

\*\* abundant higher molecular forms of SP-B and SP-C

Abbreviations: mol wt molecular weight

### Supplemental table 7

#### Hydrophobic surfactant proteins (SP) C and B. Semiquantitative levels assessed by Western blotting in bronchoalveolar lavage fluid of patients with compound heterozygous ABCA3 mutations

| Pt ID | Age at BAL (years) | SP-C<br>mol. wt. (kDa) |     | SP-B<br>mol. wt. (kDa) |     |       |
|-------|--------------------|------------------------|-----|------------------------|-----|-------|
|       |                    | 4                      | 8   | 8                      | 16  | 24    |
| 23    | 0.7                | 0                      | +   | 0                      | ++  | 0     |
| 25    | 0.3                | ++                     | 0   | 0                      | ++  | +     |
| 27    | 1.7                | +++                    | +++ | +++                    | +++ | +++** |
| 28    | 2.9                | +                      | +   | ++                     | +++ | ++    |
| 31    | 33                 | ++                     | +++ | +                      | +++ | +**   |
| 36    | 0.2                | +                      | +   |                        | +++ | 0     |
| 38    | 0.05               | +*                     | 0*  |                        | +   | +++   |

Immune reactive bands were semiquantitatively expressed in relation to standard run concurrently (Griese et al 2015). 0 no band, + > 0 but below reference range, ++ within reference range, +++ above reference range; Reference values SP-C (4-5 kDa  $116 \pm 14$  ng/ml; 8 kDa  $140 \pm 81$  ng/ml), SP-B (8kDa  $68 \pm 22$  ng/ml; 16-18kDa  $580 \pm 53$  ng/ml; 24-38 kDa  $288 \pm 89$  ng/ml)

\*repeated analysis with 20 $\mu$ g protein, very little SP-C detected, mainly at higher molecular weight;

\*\* abundant total protein, relative to SP-B normal SP-C, resembles PAP, surfactant uptake error

Abbreviations: mol wt molecular weight

**Supplemental table 8**

**Semiquantitative immunohistochemical score of ABCA3 protein expression in different lung tissues of 12 patients with ABCA3 mutations mutations**

| <b>Patient ID</b>                                          | <b>Mutation</b> | <b>Follow-Up<br/>(age [y])</b> | <b>Intensity<br/>of ABCA3<br/>Staining</b> | <b>ABCA3-<br/>Aggregates</b> | <b>ABCA3<br/>staining<br/>pattern</b> |
|------------------------------------------------------------|-----------------|--------------------------------|--------------------------------------------|------------------------------|---------------------------------------|
| <b>patients with homozygous ABCA3 mutations</b>            |                 |                                |                                            |                              |                                       |
| <b>other/other</b>                                         |                 |                                |                                            |                              |                                       |
| 7                                                          | p.E1364K        | dead (0.4)                     | 2                                          | 1                            | 1                                     |
| 5                                                          | p.K1388N        | dead (0.2)                     | 1                                          | 1                            | 1                                     |
| <b>null/null</b>                                           |                 |                                |                                            |                              |                                       |
| 17                                                         | p.R1561X        | dead (0.08)                    | 0                                          | 0                            | 0                                     |
| 14                                                         | p.R1561X        | dead (0.13)                    | 0                                          | 0                            | 0                                     |
| 20                                                         | p.F810Cfs*      | dead (0.06)                    | 0                                          | 0                            | 0                                     |
| <b>patients with compound heterozygous ABCA3 mutations</b> |                 |                                |                                            |                              |                                       |
| <b>other/other</b>                                         |                 |                                |                                            |                              |                                       |
| 34                                                         | p.L798P         | sick-worse                     | 1                                          | 0                            | 1                                     |
|                                                            | p.R1612P        | (0.15)                         |                                            |                              |                                       |
| 24                                                         | p.P193S         | dead (0.7)                     | 1                                          | 0                            | 1                                     |
|                                                            | p.G1421R        |                                |                                            |                              |                                       |
| 28                                                         | p.P32S          | dead (3.6)                     | 2                                          | 1                            | 1                                     |
|                                                            | p.G1314E        |                                |                                            |                              |                                       |
| 27                                                         | p.R43C          | dead (4.5)                     | 2                                          | 1                            | 1                                     |
|                                                            | p.R208W         |                                |                                            |                              |                                       |
| <b>null/ other</b>                                         |                 |                                |                                            |                              |                                       |
| 36                                                         | p.A1046E        | dead (0.2)                     | 1                                          | 0                            | 1                                     |
|                                                            | p.A1338T        |                                |                                            |                              |                                       |
|                                                            | Del Ex29        |                                |                                            |                              |                                       |
| 39                                                         | p.L1584Rfs*49   | dead (0.13)                    | 1                                          | 0                            | 1                                     |
|                                                            | p.R43L          |                                |                                            |                              |                                       |

|    |                                         |            |   |   |   |
|----|-----------------------------------------|------------|---|---|---|
| 38 | p.R288K<br>p.L579P<br>p.R1272Gfs*7<br>3 | dead (0.1) | 1 | 0 | 1 |
|----|-----------------------------------------|------------|---|---|---|

---

**controls**

---

|     |  |  |   |   |   |
|-----|--|--|---|---|---|
| c1  |  |  | 3 | 2 | 2 |
| c2  |  |  | 3 | 2 | 2 |
| c3  |  |  | 3 | 2 | 2 |
| c4  |  |  | 3 | 2 | 2 |
| c5  |  |  | 3 | 2 | 2 |
| c6  |  |  | 2 | 1 | 2 |
| c7  |  |  | 3 | 2 | 2 |
| c8  |  |  | 3 | 2 | 2 |
| c9  |  |  | 3 | 2 | 2 |
| c10 |  |  | 3 | 2 | 2 |

---

Stained slides were blinded and rated twice. Intensity of ABCA3 staining was rated as 0 no, 1 weak, 2 moderate 3 strong staining, ABCA3 aggregates as 0 no, 1 small, 2 big aggregates and ABCA3 staining pattern as 0 no, 1 diffuse, 2 ring-like staining.

**Supplemental table 9**

**Chest X-rays (CXR) in patients with homozygous ABCA3 mutations**

| age range                           | ≤ 0.1 years                           |                                            | 0.1 – 1 years                         |                                            |
|-------------------------------------|---------------------------------------|--------------------------------------------|---------------------------------------|--------------------------------------------|
| CXR finding                         | # of positive patients/total patients | mean score of finding in positive patients | # of positive patients/total patients | mean score of finding in positive patients |
| ground glass opacity                | 4/4                                   | 1.0                                        | 2/2                                   | 1.0                                        |
| cysts                               | 1/4                                   | 0.8                                        | 0/2                                   |                                            |
| bronchial wall thickening           | 4/4                                   | 0.8                                        | 2/2                                   | 1.3                                        |
| peripheral bronchial dilatation     | 4/4*                                  | 0.6                                        | 2/2*                                  | 1.2                                        |
| reticular pattern                   | 4/4                                   | 1.4                                        | 2/2                                   | 1.8                                        |
| hyperinflation                      | 2/4                                   | 0.3                                        | 2/2                                   | 0.6                                        |
| nodular pattern                     | 0/4                                   |                                            | 1/2                                   | 0.4                                        |
| lobe retraction                     | 0/4                                   |                                            | 0/2                                   |                                            |
| consolidation                       | 3/4                                   | 0.2                                        | 2/2                                   | 0.2                                        |
| mean age at CXR (range [years])     | 0.02 (0.01-0.04)                      |                                            | 0.3 (0.28-0.34)                       |                                            |
| # of total investigations/age range | 33                                    |                                            | 17                                    |                                            |

CXRs over time with sufficient rating quality were available in 5 homozygous patients (IDs 6, 7, 17, 18, 20); CXRs were rated in six areas (apex to carina, carina to lower pulmonary vein, below pulmonary vein on left and right side) for the indicated findings as 0=none, 1= discrete, 2 = diffuse and 3 = very strong; mean patient values were grouped in the indicated age ranges; mean values were then calculated per finding

\* radiological presentation resembles bronchiectasis as defined by the Fleischner society [15]

**Supplemental table 10**

**Chest X-rays (CXR) in patients with compound heterozygous ABCA3 mutations**

| age range                           | ≤ 0.1 years                           |                                            | 0.1 - 1 years                         |                                            | ≥ 1 year                              |                                            |
|-------------------------------------|---------------------------------------|--------------------------------------------|---------------------------------------|--------------------------------------------|---------------------------------------|--------------------------------------------|
| CXR finding                         | # of positive patients/total patients | mean score of finding in positive patients | # of positive patients/total patients | mean score of finding in positive patients | # of positive patients/total patients | mean score of finding in positive patients |
| ground glass opacity                | 4/4                                   | 1.4                                        | 5/5                                   | 1.7                                        | 3/3                                   | 0.9                                        |
| cysts                               | 0/4                                   |                                            | 3/5                                   | 0.3                                        | 3/3                                   | 0.2                                        |
| bronchial wall thickening           | 4/4                                   | 1.0                                        | 5/5                                   | 1.2                                        | 3/3                                   | 1.3                                        |
| peripheral bronchial dilatation     | 0/4                                   |                                            | 0/5                                   |                                            | 2/3*                                  | 0.5                                        |
| reticular pattern                   | 4/4                                   | 1.5                                        | 5/5                                   | 2.1                                        | 3/3                                   | 1.7                                        |
| hyperinflation                      | 2/4                                   | 0.3                                        | 4/5                                   | 1.1                                        | 3/3                                   | 0.9                                        |
| nodular pattern                     | 2/4                                   | 0.5                                        | 3/5                                   | 0.8                                        | 1/3                                   | 0.2                                        |
| lobe retraction                     | 0/4                                   |                                            | 0                                     | 0                                          | 0/3                                   |                                            |
| consolidation                       | 2/4                                   | 0.1                                        | 3/5                                   | 0.2                                        | 3/3                                   | 0.3                                        |
| mean age at CXR (range [years])     | 0.02 (0.01-0.04)                      |                                            | 0.3 (0.13-0.53)                       |                                            | 2.35 (1.58-3.5)                       |                                            |
| # of total investigations/age range | 27                                    |                                            | 18                                    |                                            | 36                                    |                                            |

CXRs over time with sufficient rating quality were available in 7 compound heterozygous patients (IDs 23, 27, 28, 35, 36, 37, 40); CXRs were rated in six areas (apex to carina, carina to lower pulmonary vein, below pulmonary vein on left and right side) for the indicated findings as 0=none, 1= discrete, 2 = diffuse and 3 = very strong; mean patient values were grouped in the indicated age intervals; mean value were then calculated per finding

\* radiological presentation resembles bronchiectasis as defined by the Fleischner society [15]



**Supplemental table 11**

**Chest computed tomography (CT) in patients with homozygous and compound heterozygous ABCA3 mutations**

|                                 | homozygous                                |                                            | compound heterozygous                     |                                            |                                           |                                            |                                           |                                            |
|---------------------------------|-------------------------------------------|--------------------------------------------|-------------------------------------------|--------------------------------------------|-------------------------------------------|--------------------------------------------|-------------------------------------------|--------------------------------------------|
|                                 | ≤ 0.15 years                              |                                            | 0.15 – 1 years                            |                                            | 1-3 years                                 |                                            | 7 years                                   |                                            |
| CT finding                      | # of positive patients/<br>total patients | mean score of finding in positive patients | # of positive patients/<br>total patients | mean score of finding in positive patients | # of positive patients/<br>total patients | mean score of finding in positive patients | # of positive patients/<br>total patients | mean score of finding in positive patients |
| ground glass                    | 6/6                                       | 2.8                                        | 2/2                                       | 1.4                                        | 2/2                                       | 1.3                                        | 1/1                                       | 1.3                                        |
| cysts                           | 4/6                                       | 0.7                                        | 2/2                                       | 1.2                                        | 1/2                                       | 0.2                                        | 1/1                                       | 1.2                                        |
| bronchial wall thickening       | 2/6                                       | 0.6                                        | 2/2                                       | 0.5                                        | 2/2                                       | 0.8                                        | 1/1                                       | 0.7                                        |
| peripheral bronchial dilatation | 4/6*                                      | 1.8*                                       | 1/2*                                      | 0.3                                        | 0/2                                       |                                            | 1/1                                       | 0.7                                        |
| honey combing                   | 1/6                                       | 0.7                                        | 2/2                                       | 0.6                                        | 1/2                                       | 0.3                                        | 0/1                                       | 0                                          |
| reticular pattern               | 6/6                                       | 2.1                                        | 2/2                                       | 2.1                                        | 2/2                                       | 0.7                                        | 1/1                                       | 2                                          |
| paraseptal emphysema            | 0/6                                       |                                            | 1/2                                       | 0.8                                        | 0/2                                       |                                            | 1/1                                       | 1                                          |
| nodular pattern                 | 0/6                                       |                                            | 1/2                                       | 0.3                                        | 0/2                                       |                                            | 0/1                                       | 0                                          |
| lobe retraction                 | 0/6                                       |                                            | 0/2                                       | 0                                          | 0/2                                       |                                            | 0/1                                       | 0                                          |
| consolidation                   | 3/6                                       | 0.7                                        | 1/2                                       | 0.3                                        | 0/2                                       |                                            | 0/1                                       | 0                                          |
| crazy paving                    | 1/6                                       | 1.3                                        | 1/2                                       | 1.2                                        | 0/2                                       |                                            | 0/1                                       | 0                                          |

|                                   |                  |                  |                  |     |
|-----------------------------------|------------------|------------------|------------------|-----|
| mean age at CT<br>(range [years]) | 0.07 (0.03-0.13) | 0.55 (0.48-0.62) | 2.11 (1.58-2.63) | 7.4 |
|-----------------------------------|------------------|------------------|------------------|-----|

CCTs with sufficient rating quality were available in 6 homozygous patients (patients IDs 6, 8, 9, 14, 17, 21) and 4 compound heterozygous patients (patient IDs 23, 27, 32, 35). CTs were rated in six areas (apex to carina, carina to lower pulmonary vein, below pulmonary vein on left and right side) for the indicated findings as 0=none, 1= discrete, 2 = diffuse and 3 = very strong; the results were grouped in the indicated age intervals, mean values calculated per finding

\* radiological presentation resembles bronchiectasis as defined by the Fleischner society [15]

Supplemental figure 1:

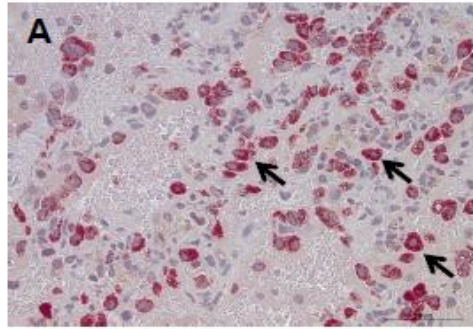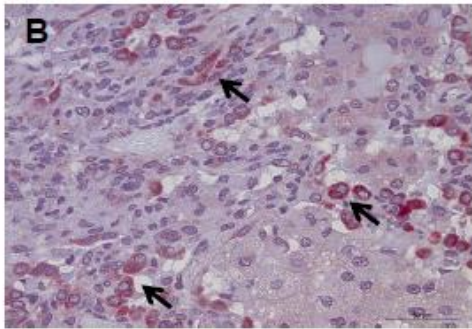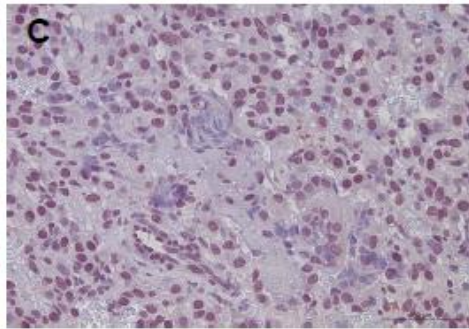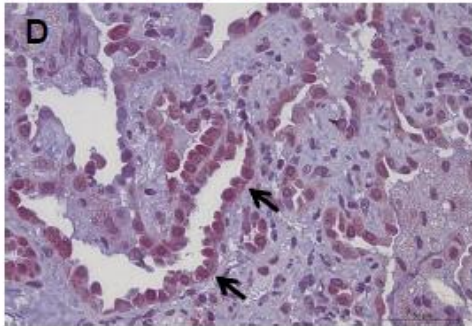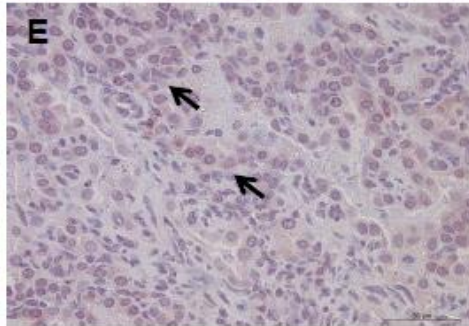

**Legend to supplemental figure 1:**

**Immunohistochemical staining of ABCA3 protein in lung tissues.** A: Control tissue showing strong cytoplasmic ring-like staining of ABCA3 protein in type II pneumocytes (arrow, patient c1). B: Tissue with homozygous other/other ABCA3 mutations displaying diffuse or/and almost absent staining of ABCA3 protein (arrow, patient 7). C: Tissue with homozygous null/null ABCA3 mutation showing no protein expression (arrow, patient 20). D: Tissue with compound heterozygous other/other ABCA3 mutations showing weak and diffuse staining of ABCA3 protein (arrow, patient 27). E: Tissue with compound heterozygous null/other ABCA3 mutations displaying diffuse and very weak staining of ABCA3 protein (arrow, patient 38). Scale: 50 $\mu$ m.

**Supplemental figure 2:**

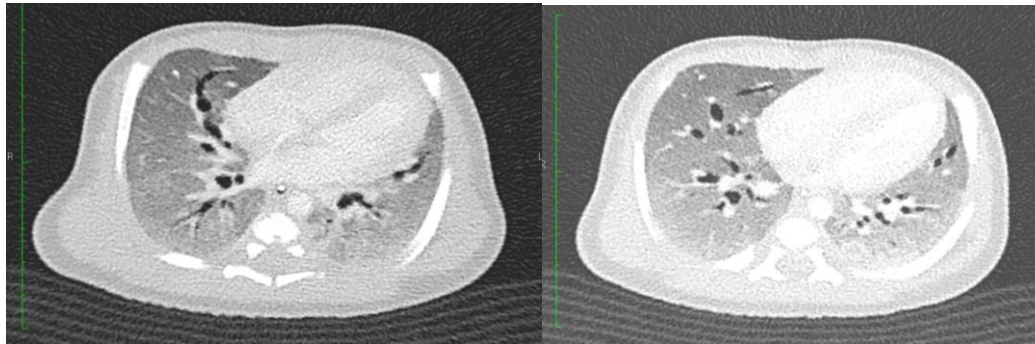

**Legend to supplemental figure 2:**

**CT of patient 6 (0.03 years):** peripheral bronchial dilatation, dorsal consolidation, reticular pattern

**Supplemental figure 3:**

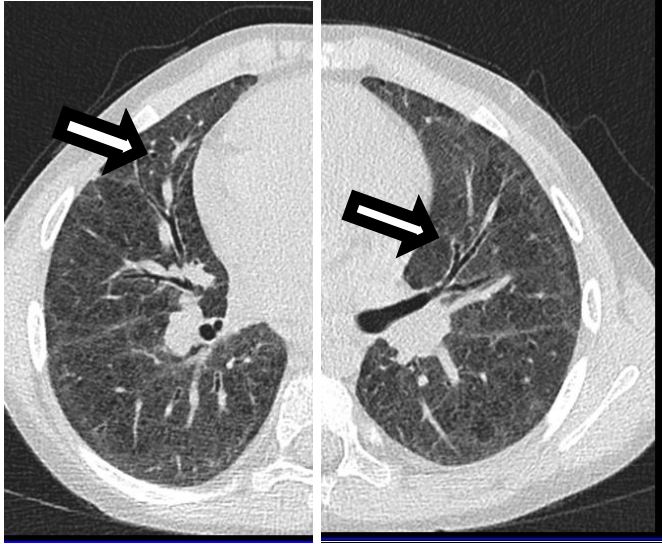

**Legend to supplemental figure 3:**

**CT patient 32 (7.4 y):** reticular pattern, beginning bronchiectasis (arrows)

## Supplement A:

### *Clinical course of 5 patients with compound-heterozygous ABCA3 mutations and prolonged survival*

Patient 27 presented at the age of 0.9 years with dry cough; at the age of one year he suffered two bronchopneumonias and has been since then oxygen dependent. His weight percentile was < 3. CXR exhibited lymphoreticular interstitial thickening and hilar lymphadenopathia. At age 1.4 years, he had cyanosis with excitement and subcostal retractions, at the age of 1.8 years discrete clubbing. A lung biopsy at the age of 1.5 years showed interstitial lung disease with combination of DIP, NSIP and PAP, focal intraalveolar cholesterol granulomas, pneumocyte type II hyperplasia. HRCT at the age of 1.8 showed diffuse ground glass, micronodular attenuations, interlobular and interlobar septal thickening and hilar lymphadenopathia. Treatment with systemic steroids yielded little effect; he was discharged with home oxygen. At the age of 4.5 years he died due to respiratory insufficiency.

Patient 28 presented at the age of 0.5 years with failure to thrive; at the age of one year she suffered cough attacks, cyanosis and clubbing, and repeated pneumonias. Surfactant analysis at the age of 2.9 years showed a SP-C deficiency. Lung biopsy at the age of 3 years showed NSIP and DIP and unusual SP-C staining, however, normal ABCA3 staining. At the age 3.5 years she was diagnosed with interstitial pneumonia, treatment with systemic steroids showed initial good improvement, and hydroxychloroquine moderate improvement. She was discharged home with oxygen, and died at 3.6 years due to RDS after a viral infection.

Patient 31 presented first at the age of 33.5 years with slight dyspnea and dry cough with strong exercise as a top athlete. CT demonstrated a reticular-nodular pattern. Diagnostic lavage and serum investigations demonstrated the typical findings of GMCSF autoantibody positive, adult autoimmune pulmonary alveolar proteinosis (PAP). She had 10 fold elevated levels of autoantibodies. Clinically and radiologically she responded well to two treatments with whole lung lavages (WLLs). However she had persistent impaired diffusion capacity for CO (about 60% of predicted), exercise intolerance and some ground glass opacities on CT scan over several years, whereas her PAP was in remission. We hypothesized that the patient is suffering from both, autoimmune PAP and DPLD due to the ABCA3 mutations.

Patient 32 first presented at the age of 2.5 years with a mycoplasma pneumonia, cyanosis and tachydyspnea. She exhibited finger clubbing. She has since then been steroid dependent and suffered recurrent respiratory infections. Due to gastro-esophageal reflux a Thal and a Nissen surgery was performed. Today, at the age of 5 years her SaO<sub>2</sub> at rest is 88-90% and CXR reveals interstitial pulmonary fibrosis with ground glass and interstitial thickening. Treatment with steroid yields moderate improvement.

Patient 37 was born at 39 weeks, developed primary respiratory distress syndrome and was intubated on day 2. She was treated with systemic steroids and surfactant, and was severely ventilated, developed several pneumothoraces. Radiologically, she presented with ground glass and marked interstitial thickening. After a short period of extubation she was reintubated at the age of one month, again requiring HFO. Hydroxychloroquine was started at the age of one month with delayed but moderate improvement. She was in- and extubated several times, was oxygen dependent and lastly ventilated at the age of 5 months. Since then she has been hospitalized several times due to viral infections and was intermittently without oxygen. At the age of 4 years, her CXR shows only mild interstitial thickening. Today, at the age of 7.5 years she is still oxygen dependent, remains on hydroxychloroquine (4mg/kg/d), and attends school. Her FVC is

39%pred; FEV1 48%pred; SaO2 98% at rest, after exercise: 83-85%. HRCT today shows diffuse ground glass both sides and multiple cysts up to 2-3 cm. She has a PEG for failure to thrive.

- 1 Bruder E, Hofmeister J, Aslanidis C et al. Ultrastructural and molecular analysis in fatal neonatal interstitial pneumonia caused by a novel ABCA3 mutation. *Modern Pathol* 2007;20(10):1009-1018.
- 2 Brasch F, Schimanski S, Muhlfeld C, et al. Alteration of the pulmonary surfactant system in full-term infants with hereditary ABCA3 deficiency. *Am J Respir Crit Care Med* 2006;174(5):571-580.
- 3 Parappil H, Al Baridi A, ur Rahman S, et al. Respiratory distress syndrome due to a novel homozygous ABCA3 mutation in a term neonate. *BMJ Case Rep* 2011;Mar32011
- 4 Wambach JA, Casey AM, Fishman MP, et al. Genotype-phenotype correlations for infants and children with ABCA3 deficiency. *Am J Respir Crit Care Med* 2014;189(12):1538-1543.
- 5 Saugstad OD, Hansen TW, Ronnestad A, et al. Novel mutations in the gene encoding ATP binding cassette protein member A3 (ABCA3) resulting in fatal neonatal lung disease. *Acta Paediatr* 2007;96(2):185-190.
- 6 Campo I, Zorzetto M, Mariani F, et al. A large kindred of pulmonary fibrosis associated with a novel ABCA3 gene variant. *Respir Res* 2014;15:43.
- 7 Edwards V, Cutz E, Viero S, et al. Ultrastructure of lamellar bodies in congenital surfactant deficiency. *Ultrastruct Pathol* 2005;29(6):503-509.
- 8 Flamein F, Riffault L, Muselet-Charlier C, et al. Molecular and cellular characteristics of ABCA3 mutations associated with diffuse parenchymal lung diseases in children. *Hum Mol Gen* 2012;21(4):765-775.
- 9 Somaschini M, Nogee LM, Sassi I, et al. Unexplained neonatal respiratory distress due to congenital surfactant deficiency. *J Pediatr* 2007;150(6):649-653, 653 e641.
- 10 Doan ML, Guillerman RP, Dishop MK, et al. Clinical, radiological and pathological features of ABCA3 mutations in children. *Thorax* 2008;63(4):366-373.
- 11 Bullard JE, Wert SE, Whitsett JA, et al. ABCA3 mutations associated with pediatric interstitial lung disease. *Am J Respir Crit Care Med* 2005;172(8):1026-1031.
- 12 Matsumura Y, Ban N, Inagaki N. Aberrant catalytic cycle and impaired lipid transport into intracellular vesicles in ABCA3 mutants associated with nonfatal pediatric interstitial lung disease. *Am J Physiol Lung Cell Mol* 2008;295(4):L698-707.
- 13 Baekvad-Hansen M, Nordestgaard BG, Dahl M. Heterozygosity for E292V in ABCA3, lung function and COPD in 64,000 individuals. *Respir Res* 2012;13:67.
- 14 Goncalves JP, Pinheiro L, Costa M, et al. Novel ABCA3 mutations as a cause of respiratory distress in a term newborn. *Gene* 2014;534(2):417-420.
- 15 Hansell DM, Bankier AA, MacMahon H, et al. Fleischner Society: glossary of terms for thoracic imaging. *Radiology* 2008;246(3):697-722.
